# Supplementary material
Source: PubMed Central journal article supplement (PMC2018654)
Supplement: NIHMS30109-supplement-03.pdf [file NIHMS30109-supplement-03.pdf]

**Table 1. QRT-PCR Conditions**

| <b>Target</b>  | <b>5' primer</b>           | <b>3' Primer</b>           | <b>Annealing temp, °C</b> |
|----------------|----------------------------|----------------------------|---------------------------|
| GLUT4          | 5'-cagctctcaggcatcaat-3'   | 5'-tctactaagagcaccgag-3'   | 53                        |
| CHOP10         | 5'-aatctggagagcgagggtt-3'  | 5'-tcactactcttgaccctgcg-3' | 57                        |
| C/EBP $\alpha$ | 5'-tggacaagaacagcaacgag-3' | 5'-tcaactggtaactccagcac-3' | 57                        |
| BiP            | 5'-cagatcttctccacggcttc-3' | 5'-ttcagctgtcactcggagaa-3' | 55                        |
| 18S            | 5'-cgaccaaaggaaccataact-3' | 5'-tggttgatcctgccagtag-3'  | 57                        |
